# Supplementary material for: Atypical Pathogen-Induced Peritoneal Dialysis-Associated Peritonitis: A Case Series and Infection Source Analysis
Source: Research Square preprint supplement (doi:10.21203/rs.3.rs-8453338/v1), 2026-02-03
Supplement: Supplementary file 1 [file 6f24aa8583d023d4dc3bc13d.xlsx]

## Sheet: 2021-2024English 
Name	Hospitalization number	Sex	Complications	Time of infection	Causative organism	结果
1	241908	female	peritoneal dialysis	2021-01-16	Negative results	Medical cure
2	70165	male	peritoneal dialysis	2021-01-30	Streptococcus salivarius	Medical cure
3	178854	male	peritoneal dialysis	2021-03-12	Staphylococcus epidermidis	Medical cure
4	281067	female	peritoneal dialysis	2021-03-25	Negative results	Medical cure
5	99733	female	peritoneal dialysis	2021-04-05	streptococcus anginosus	Medical cure
6	243111	female	peritoneal dialysis	2021-06-18	Negative results	Medical cure
7	161514	male	peritoneal dialysis	2021-06-21	Negative results	Medical cure
8	355837	male	peritoneal dialysis	2021-07-15	Staphylococcus haemolyticus	Medical cure
9	241908	female	peritoneal dialysis	2021-09-16	Negative results	Medical cure						51		列1	Gram-positive bacteria	Negative results	Gram-negative bacteria	Multiple infections	Fungi	Mycobacterium tuberculosis
10	108202	male	peritoneal dialysis	2021-10-20	Pseudomonas aeruginosa	Medical cure								总和("列2")	23	13	8	4	2	1
11	194203	male	peritoneal dialysis	2021-11-15	Negative results	Medical cure
12	264111	male	peritoneal dialysis	2021-11-16	streptococcus anginosus	Medical cure
13	108202	male	peritoneal dialysis	2021-11-16	Pseudomonas aeruginosa	Medical cure
14	195653	female	peritoneal dialysis	2021-11-19	Candida parapsilosis	catheter removal
15	241908	female	peritoneal dialysis	2021-12-09	Negative results	Medical cure
16	249244	male	peritoneal dialysis	2022-01-03	Pseudomonas aeruginosa	death
17	126088	female	peritoneal dialysis	2022-04-08	Streptococcus salivarius	Medical cure
18	252710	female	peritoneal dialysis	2022-04-12	Negative results	Medical cure
19	108059	male	peritoneal dialysis	2022-07-06	Negative results乳链球菌	Medical cure
20	56134	female	peritoneal dialysis	2022-07-24	Gemella morbillorum	Medical cure
21	194062	male	peritoneal dialysis	2022-07-24	Negative results	Medical cure
22	237509	male	peritoneal dialysis	2022-08-03	streptococcus anginosus	Medical cure
23	276372	female	peritoneal dialysis	2022-09-22	Lactococcus raffinolactis	Medical cure
24	194203	male	peritoneal dialysis	2022-11-04	Bacteroides fragilis	Medical cure
25	130250	male	peritoneal dialysis	2022-12-21	Negative results	Medical cure
26	238818	male	peritoneal dialysis	2022-12-24	Streptococcus salivarius	Medical cure
27	360099	male	peritoneal dialysis	2023-01-06	Escherichia coli	Medical cure
28	186728	female	peritoneal dialysis	2023-01-18	Streptococcus sanguinis.	Medical cure
29	257885	male	peritoneal dialysis	2023-01-15	Negative results	Medical cure
30	242024	female	peritoneal dialysis	2023-02-03	Negative results	Medical cure
31	196911	female	peritoneal dialysis	2023-02-22	Staphylococcus epidermidis	Medical cure
32	180562	male	peritoneal dialysis	2023-02-28	Negative results	Medical cure
33	235890	male	peritoneal dialysis	2023-04-06	Gemella Haemolysans	Medical cure
34	238818	male	peritoneal dialysis	2023-04-14	Mycobacterium tuberculosis	catheter removal
35	126656	male	peritoneal dialysis	2023-06-06	Escherichia coli	Medical cure
36	357583	female	peritoneal dialysis	2023-05-12	streptococcus anginosus	Medical cure
37	180562	male	peritoneal dialysis	2023-07-08	streptococcus anginosus	Medical cure
38	365378	male	peritoneal dialysis	2023-07-16	Staphylococcus aureus	Medical cure
39	180562	male	peritoneal dialysis	2023-11-03	Pseudomonas luteola，Leuconostoc mesenteroides subsp， and Staphylococcus pasteuri	Medical cure
40	180562	male	peritoneal dialysis	2023-12-18	streptococcus anginosus/Streptococcus salivarius	Medical cure
41	218705	male	peritoneal dialysis	2023-08-14	streptococcus anginosus	Medical cure
42	360702	male	peritoneal dialysis	2023-08-02	Streptococcus mitis	Medical cure
43	61479	male	peritoneal dialysis	2023-10-03	Escherichia coli	Medical cure
44	360702	male	peritoneal dialysis	2023-10-16	streptococcus anginosus	Medical cure
45	389382	male	peritoneal dialysis	2023-10-11	Streptococcus salivarius	Medical cure
46	240694	male	peritoneal dialysis	2023-12-18	streptococcus anginosus/Streptococcus salivarius	Medical cure
47	372810	male	peritoneal dialysis	2023-10-24	Staphylococcus aureus	Medical cure
48	264974	male	peritoneal dialysis	2024-02-13	Streptococcus mitis/蜡样芽胞杆菌	Medical cure
49	59362	male	peritoneal dialysis	2024-01-04	Bacillus cereus	Medical cure
50	360702	male	peritoneal dialysis	2024-02-12	Kocuria	Medical cure
51	237509	male	peritoneal dialysis	2023-12-19	Candida tropicalis	Medical cure

## Sheet: Case
	Name	Sex	Cause of ESRD	urine volume（L/date）	Type of PD	eGFR（ml/min）	Age（years）	Duration of dialysis(months)	serum albumin（g/L）	Date of collection	Case # and site	Causative organism	Cell count and PMN	Antibiotic and route	clinical outcomes
Case 1	Zhihua，Peng	Female	Glomerulonephritis	0.8	CAPD	6	49	18	28.6	7/24/22–8/13/22	Case 1				cure
										07/24/2022	Case 1 PD fluid	Gemella morbillorum	3915（89%）	Cefazolin ip and Ceftazidime ip
										07/25/2022			600（59%）
										07/26/2022			90（27%）
Case 2	Jianzhang，Peng	Male	Hypertension	0	CAPD	2.9	63	49	34.5	7/8/23–8/21/23	Case 2				cure
										07/08/2023	Case 2 PD fluid	Pseudomonas luteola，Leuconostoc mesenteroides subsp， and Staphylococcus pasteuri	14607（89.7%）	Cefazolin ip and Ceftazidime ip
										07/10/2023			251（28%）
										07/11/2023			88（18.1%）
										08/01/2023	Case 2 blood	Pseudomonas luteola		Cefazolin ip and Ceftazidime ip
										08/02/2023	Case 2 PD fluid	Pseudomonas luteola	3678（95%）
										08/03/2023			491（65%）
										08/03/2023			1694（74.5%）
										08/04/2023			798（67.3%）
										08/05/2023			919（69%）
										08/06/2023			2543（80%）
										08/07/2023			667（64%）
										08/08/2023			1178（77%）	Meropene ip and Etimicin ip
										08/09/2023			504（61.6%）
										08/10/2023			321（63%）
										08/11/2023			374（66%）
										08/12/2023			199（52%）
										08/13/2023			142（44%）
										08/14/2023			739（55%）
										08/15/2023			175（55%）
										08/16/2023			111（26.2%）
										08/17/2023			111（25%）
										08/18/2023			111（19%）
										08/19/2023			103（15%）
										08/20/2023			54（18.5%）
Case 3	Wenhua，Yang	Female	Hypertension	0.1-0.2	CAPD	3	76	16	36.6	9/21/22–8/21/22	Case 3				cure
										09/21/2022	Case 3 PD fluid	Lactococcus raffinolactis	684（60%）	Cefazolin ip and Ceftazidime ip
										09/22/2022			326（47%）
										09/23/2022			118（13%）
										09/24/2022			73（20%）
Case 4	Jiehong，Fang	Male	Hypertension	0.7-0.8	CAPD	3.4	52	21	30.7	4/7/23–4/27/23	Case 4				cure
										04/07/2023	Case 4 PD fluid	Gemella Haemolysans	3517（85%）	Cefazolin ip and Ceftazidime ip
										04/07/2023			3457（75%）
										04/08/2023			566（30%）
										04/09/2023			175（20%）
										04/10/2023			53（15%）
Case 5	Huiyun，Zou	Female	Others/unknown	0.7-0.8	CAPD	3	57	43	28.1	1/18/23–2/7/23	Case 5				cure
										01/18/2023	Case 5 PD fluid	Streptococcus sanguinis.	1922（85%）	Cefazolin ip and Ceftazidime ip
										01/20/2023			71（22%）
										01/24/2023			18（28%）
Case 6	Haisheng，Zhuang	Male	Hypertension	1.1	CAPD	4.1	49	38	28.8	2/15/24–3/7/24	Case 6				cure
										02/15/2024	Case 6 PD fluid	Streptococcus mitis and Bacillus cereus	5638（88%）
										02/16/2024			365（47%）
										02/17/2024			188（55%）
										02/18/2024			122（51%）
										02/19/2024			232（33.7%）
										02/20/2024			117（25.6%）
										02/21/2024			178（30%）
										02/22/2024			38（11%）
Case 7	Lilun，Yin	Male	Diabetic nephropathy	1.5-2.0	CAPD	9.5	55	12	35.2	1/4/24–3/28/24	Case 7				Recurrent
										01/04/2024	Case 7 PD fluid		589（45.5%）	Cefazolin ip and Ceftazidime ip
										01/05/2024			91（6.6%）
										01/11/2024			6095（91%）
										01/12/2024			1066（51%）
										01/13/2024			350（27%）
										01/14/2024			81（13.5%）
										01/15/2024			36（16.7%）
										03/08/2024		Bacillus cereus	2316（74.4%）	Cefazolin ip and Ceftazidime ip
										03/09/2024			410（35%）
										03/10/2024			165（29%）
										03/11/2024			55（16%）
Case 8	Gongjian，Li	Male	Diabetic nephropathy	0.6-0.7	CAPD	8	61	27	28.6	8/2/23–3/28/24	Case 8				cure
										08/02/2023	Case 8 PD fluid	Streptococcus mitis	16437（84%）
										08/03/2023			1100（25%）
										08/04/2023			189（13%）
										08/05/2023			100（9%）
										08/06/2023			48（15%）
										10/16/2023		Streptococcus anginosus	7879（92%）
										10/17/2023			7131（87%）
										10/18/2023			563（53.5%）
										10/19/2023			15118（91.5%）
										10/20/2023			44（20%）
										02/13/2024		Kocuria	14274（89.5%）	Cefazolin ip and Ceftazidime ip
										02/14/2024			1228（63%）
										02/15/2024			268（16%）
										02/16/2024			67（10%）
